# Supplementary material for: Prediction of Stroke Subtype and Recanalization Using Susceptibility Vessel Sign on Susceptibility-Weighted Magnetic Resonance Imaging
Source: PubMed Central journal article supplement — Stroke. 2017 May 22;48(6):1554–9. doi: 10.1161/STROKEAHA.116.016217 (PMC5436734; doi:10.1161/strokeaha.116.016217), 2017-05-22

**SUPPLEMENTAL MATERIAL**

**Prediction of Stroke Subtype and Recanalization Using  
Susceptibility Vessel Sign on Susceptibility Weighted MRI**

**Dong-Wan Kang, MD\*;** **Han-Gil Jeong, MD, MSc\*;** **Do Yeon Kim, MD;** **Wook-Jin  
Yang, MD;** **Seung-Hoon Lee, MD, PhD, FAHA**

Department of Neurology, Seoul National University Hospital, Seoul, Korea

\* These authors contributed equally to this work.

Corresponding author:

Pf. Seung-Hoon Lee, MD, PhD, FAHA

Department of Neurology, Seoul National University Hospital

101 Daehak-ro, Jongro-gu, Seoul, 03080, Republic of Korea

Tel.: +82-2-2072-1014

Fax: +82-2-3672-7553

E-mail: [sb0516@snu.ac.kr](mailto:sb0516@snu.ac.kr)

**Supplemental Table I** - Clinical and imaging characteristics according to different MR scanners.

| Variables                        | MR machine                  |                                  |                                | <i>P</i> value |
|----------------------------------|-----------------------------|----------------------------------|--------------------------------|----------------|
|                                  | Verio<br>3T SWI<br>(n = 60) | Discovery<br>3T SWAN<br>(n = 14) | Signa<br>1.5T SWAN<br>(n = 15) |                |
| <b>Demographics</b>              |                             |                                  |                                |                |
| Age                              | 69 ± 12                     | 64 ± 17                          | 72 ± 14                        | 0.24           |
| Females                          | 29 (48%)                    | 3 (21%)                          | 10 (67%)                       | 0.05           |
| <b>Risk factors</b>              |                             |                                  |                                |                |
| Hypertension                     | 36 (60%)                    | 5 (36%)                          | 13 (87%)                       | 0.02           |
| Diabetes                         | 19 (32%)                    | 5 (36%)                          | 6 (40%)                        | 0.82           |
| Hyperlipidemia                   | 17 (28%)                    | 6 (43%)                          | 5 (33%)                        | 0.57           |
| Atrial fibrillation              | 29 (48%)                    | 6 (43%)                          | 12 (80%)                       | 0.06           |
| Ever smoking                     | 17 (28%)                    | 5 (26%)                          | 1 (7%)                         | 0.15           |
| Previous stroke<br>or TIA        | 14 (23%)                    | 7 (50%)                          | 3 (20%)                        | 0.28           |
| <b>SVS parameters</b>            |                             |                                  |                                |                |
| SVS presence                     | 47 (78%)                    | 9 (64%)                          | 13 (87%)                       | 0.34           |
| SVS diameter (mm)                | 3.9 ± 2.5                   | 3.7 ± 3.3                        | 4.2 ± 4.2                      | 0.23           |
| SVS length (mm)                  | 10.1 ± 8.1                  | 7.6 ± 6.9                        | 10.0 ± 8.1                     | 0.94           |
| SVS volume (mm <sup>3</sup> )    | 239.5 ± 265.0               | 244.9 ± 309.7                    | 218.8 ± 265.1                  | 0.96           |
| <b>Site of Occlusion</b>         |                             |                                  |                                |                |
| ICA-T                            | 12 (20%)                    | 4 (29%)                          | 2 (13%)                        | 0.63           |
| MCA M1                           | 38 (63%)                    | 6 (43%)                          | 10 (67%)                       |                |
| MCA M2 or ACA                    | 10 (17%)                    | 4 (67%)                          | 3 (20%)                        |                |
| <b>Stroke Subtype</b>            |                             |                                  |                                |                |
| Cardioembolism                   | 37 (62%)                    | 7 (50%)                          | 13 (87%)                       | 0.51           |
| Large artery atherosclerosis     | 17 (28%)                    | 5 (36%)                          | 2 (13%)                        |                |
| Other determined                 | 4 (7%)                      | 1 (7%)                           | 0 (0%)                         |                |
| Undetermined                     | 2 (3%)                      | 1 (7%)                           | 0 (0%)                         |                |
| Recanalization                   | 47 (78.3%)                  | 12 (85.7%)                       | 11 (73.3%)                     | 0.72           |
| Admission NIHSS                  | 15.5 [9.25, 19]             | 13 [7.75, 16.25]                 | 15 [11, 18]                    | 0.34           |
| Stent-retriever use              | 45 (75%)                    | 10 (71%)                         | 14 (93%)                       | 0.26           |
| IV rt-PA- yes                    | 26 (43%)                    | 5 (36%)                          | 4 (27%)                        | 0.48           |
| IV rt-PA to MRI (min)            | 46 ± 24                     | 49 ± 6                           | 24 ± 25                        | 0.31           |
| Symptom onset to puncture (h)    | 5.6 ± 2.7                   | 5.7 ± 4.7                        | 7.0 ± 3.7                      | 0.36           |
| Puncture to recanalization (min) | 40 ± 33                     | 42 ± 30                          | 34 ± 35                        | 0.74           |

**Supplemental Figure I** – Variable size of SVSs and their measurement on SWMRI.

**A.** Variable size of SVSs were shown on SWMRI. **B.** The SVS length between the proximal and distal parts of the SVS was measured. The SVS diameter was obtained by measuring the largest transverse distance perpendicular to the SVS length.

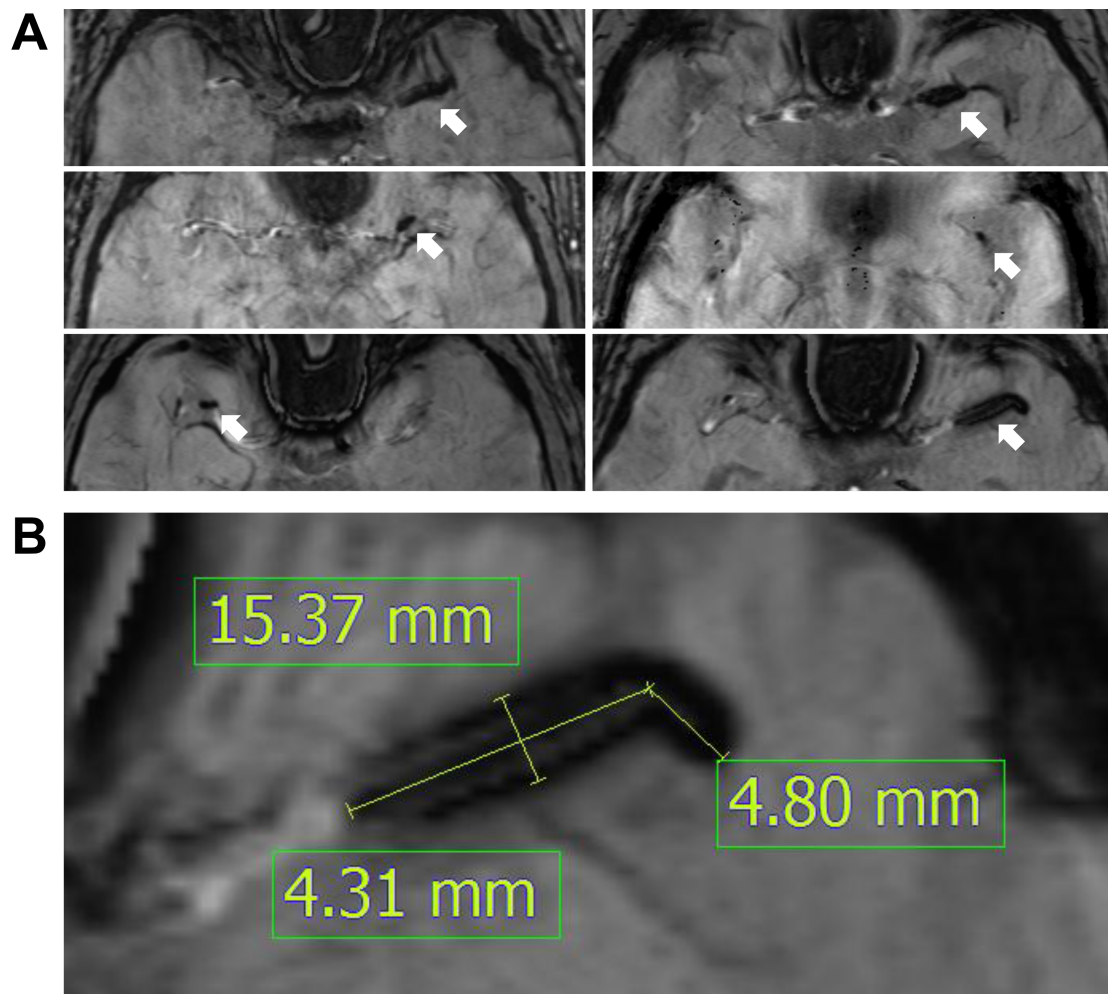

**Supplemental Figure II** – Distribution of the SVS diameter and length (n = 89) in this study.

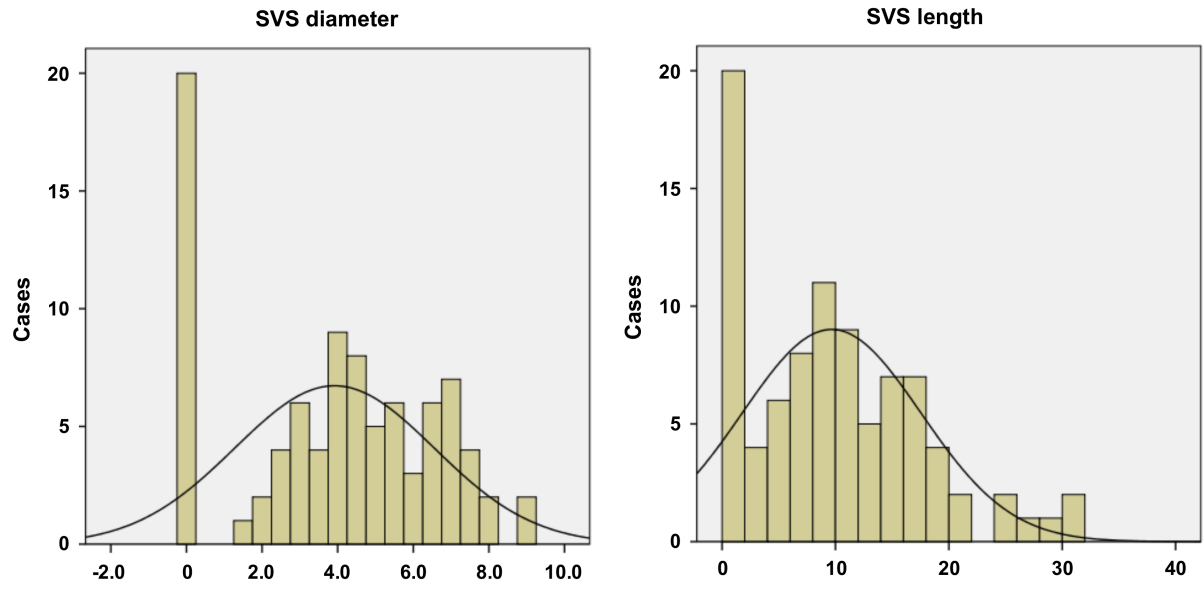

Supplement: str-48-1554-s001.pdf [file str-48-1554-s001.pdf]
